# Supplementary material for: Predictors of ophthalmology career success (POCS) study
Source: HighWire-hosted journal article supplement (doi:10.1136/bmjophth-2021-000735), 2021-07-01
Supplement: bmjophth-2021-000735supp002_data_supplement.pdf [file bmjophth-2021-000735supp002_data_supplement.pdf]

Supplementary Table 1: Univariate analysis results for UK OST applicants

| Group                | Factor                                     | Category                                 | Percent offered place on OST training programme | N doctors in sample – UKMED rounding rules applied. | Bivariate Association. Bonferroni correction applied for 18 tests |
|----------------------|--------------------------------------------|------------------------------------------|-------------------------------------------------|-----------------------------------------------------|-------------------------------------------------------------------|
| Applicant Behaviour  | Exam relative to application               | FRCOphth_Part_1 NOT taken before OST App | 27.1%                                           | 760                                                 | X <sup>2</sup> = 62.534<br>P < 0.0001                             |
|                      |                                            | FRCOphth_Part_1 taken before OST App     | 56.4%                                           | 210                                                 |                                                                   |
|                      | TIME from PMQ to first OST application     | 2 year                                   | 38.7%                                           | 955                                                 | X <sup>2</sup> = 6.597<br>P = 0.665                               |
|                      |                                            | 3 year                                   | 41.0%                                           | 210                                                 |                                                                   |
|                      |                                            | 4 or more years                          | 29.6%                                           | 190                                                 |                                                                   |
|                      | Only applied to OST                        | Applied to multiple specialties          | 30.8%                                           | 785                                                 | X <sup>2</sup> = 38.501<br>P < 0.001                              |
|                      |                                            | Only applied to OST                      | 47.5%                                           | 565                                                 |                                                                   |
|                      | ORIEL Year for 1 <sup>st</sup> application | 2012                                     | 55.8%                                           | 215                                                 | X <sup>2</sup> = 39.020<br>P < 0.0001                             |
|                      |                                            | 2013                                     | 40.0%                                           | 165                                                 |                                                                   |
|                      |                                            | 2014                                     | 32.3%                                           | 190                                                 |                                                                   |
| 2015                 |                                            | 35.7%                                    | 195                                             |                                                     |                                                                   |
| 2016                 |                                            | 33.9%                                    | 220                                             |                                                     |                                                                   |
| 2017                 |                                            | 31.0%                                    | 195                                             |                                                     |                                                                   |
| Demographics         | Sex                                        | Man                                      | 36.6%                                           | 760                                                 | X <sup>2</sup> = 0.925<br>P = 1                                   |
|                      |                                            | Woman                                    | 39.3%                                           | 590                                                 |                                                                   |
|                      | Ethnicity                                  | No record                                | 55.0%                                           | 20                                                  | X <sup>2</sup> = 17.576<br>P = 0.133                              |
|                      |                                            | Asian or Asian British                   | 35.1%                                           | 595                                                 |                                                                   |
|                      |                                            | Black or Black British                   | 29.2%                                           | 70                                                  |                                                                   |
|                      |                                            | Mixed                                    | 36.7%                                           | 50                                                  |                                                                   |
|                      |                                            | Not stated                               | 38.9%                                           | 20                                                  |                                                                   |
|                      |                                            | Other Ethnic Groups                      | 29.1%                                           | 110                                                 |                                                                   |
| White                |                                            | 43.7%                                    | 485                                             |                                                     |                                                                   |
| HESA Disability last | No record                                  | 52.9%                                    | 15                                              | Cells counts too                                    |                                                                   |

| Group          | Factor                  | Category                                            | Percent offered place on OST training programme | N doctors in sample – UKMED rounding rules applied. | Bivariate Association. Bonferroni correction applied for 18 tests |
|----------------|-------------------------|-----------------------------------------------------|-------------------------------------------------|-----------------------------------------------------|-------------------------------------------------------------------|
|                |                         | A long-standing illness or health condition         | 63.6%                                           | 10                                                  | low to meet expected frequency criterion.                         |
|                |                         | Another disability, impairment or medical condition | 100.0%                                          | 0                                                   |                                                                   |
|                |                         | Deaf or a serious hearing impairment                | 30.8%                                           | 15                                                  |                                                                   |
|                |                         | No known disability                                 |                                                 | 0                                                   |                                                                   |
|                |                         | Not known                                           |                                                 | 0                                                   |                                                                   |
|                |                         | Specific learning difficulty                        | 33.3%                                           | 5                                                   |                                                                   |
|                |                         | Two or more conditions                              | 38.0%                                           | 1200                                                |                                                                   |
|                | HESA Disability summary | No                                                  | 33.3%                                           | 10                                                  | X <sup>2</sup> = 1.638<br>P= 1                                    |
|                |                         | Yes                                                 | 31.2%                                           | 95                                                  |                                                                   |
|                |                         | Missing                                             | 32.8%                                           | 265                                                 |                                                                   |
|                | IMD Quintile            | Missing                                             | 31.8%                                           | 130                                                 | X <sup>2</sup> =9.378<br>P= 1                                     |
|                |                         | 1 - Most deprived                                   | 37.0%                                           | 190                                                 |                                                                   |
|                |                         | 2                                                   | 39.3%                                           | 180                                                 |                                                                   |
|                |                         | 3                                                   | 38.2%                                           | 240                                                 |                                                                   |
|                |                         | 4                                                   | 43.2%                                           | 345                                                 |                                                                   |
|                | POLAR quintile          | 5 - Least deprived                                  | 32.8%                                           | 265                                                 | X <sup>2</sup> = 3.610<br>P= 1                                    |
|                |                         | Missing                                             | 31.3%                                           | 65                                                  |                                                                   |
|                |                         | 1 - Lowest rate of participation                    | 36.4%                                           | 105                                                 |                                                                   |
|                |                         | 2                                                   | 36.4%                                           | 175                                                 |                                                                   |
|                |                         | 3                                                   | 39.1%                                           | 255                                                 |                                                                   |
|                | SEC Combined            | 4                                                   | 41.4%                                           | 490                                                 | X <sup>2</sup> = 4.676<br>P= 1                                    |
|                |                         | 5 - Highest rate of participation                   | 33.0%                                           | 100                                                 |                                                                   |
|                |                         | 1 semi-routine and routine occupations              | 35.3%                                           | 15                                                  |                                                                   |
|                |                         | 2 lower supervisory and technical occupations       | 26.5%                                           | 35                                                  |                                                                   |
|                |                         | 3 small employers and own account workers           | 34.3%                                           | 105                                                 |                                                                   |
|                |                         | 4 intermediate occupations                          | 39.6%                                           | 830                                                 |                                                                   |
|                | Graduate on entry       | 5 managerial and professional occupations           | 36.9%                                           | 270                                                 | X <sup>2</sup> = 1.905<br>P= 1                                    |
| 99 Missing     |                         | 38.7%                                               | 955                                             |                                                     |                                                                   |
| No HESA record |                         | 40.9%                                               | 20                                              |                                                     |                                                                   |
|                | Graduate on entry       | 33.8%                                               | 225                                             | P= 1                                                |                                                                   |

| Group                   | Factor                                         | Category                   | Percent offered place on OST training programme | N doctors in sample – UKMED rounding rules applied. | Bivariate Association. Bonferroni correction applied for 18 tests |
|-------------------------|------------------------------------------------|----------------------------|-------------------------------------------------|-----------------------------------------------------|-------------------------------------------------------------------|
|                         | Bursary                                        | Not graduate on entry      | 38.6%                                           | 1105                                                |                                                                   |
|                         |                                                | N                          | 38.2%                                           | 1330                                                | $\chi^2 = 6.082$                                                  |
|                         |                                                | Y                          | 9.5%                                            | 20                                                  | $P = 0.246$                                                       |
|                         | Parental education – cases with HESA data only | No                         | 29.7%                                           | 35                                                  | $\chi^2 = 2.767$<br>$P = 1$                                       |
|                         |                                                | Yes                        | 31.1%                                           | 105                                                 |                                                                   |
|                         |                                                | Don't know                 | 31.5%                                           | 180                                                 |                                                                   |
|                         |                                                | Unknown                    | 37.0%                                           | 420                                                 |                                                                   |
|                         | Age on application                             | Mean age - not offered     | 27.3853                                         | 840                                                 | $F = 10.989$                                                      |
|                         |                                                | Mean age - offered         | 26.7867                                         | 510                                                 | $P = 0.017$                                                       |
|                         | Medical school                                 | Course type grouped        | Standard entry                                  | 38.6%                                               | 1150                                                              |
| Graduate entry          |                                                |                            | 35.4%                                           | 125                                                 |                                                                   |
| Gateway and Preliminary |                                                |                            | 22.4%                                           | 50                                                  |                                                                   |
| Missing                 |                                                |                            | 47.8%                                           | 25                                                  |                                                                   |
| Intercalation           |                                                | No record of intercalating | 36.2%                                           | 995                                                 | $\chi^2 = 2.859$                                                  |
|                         |                                                | Record of intercalating    | 41.6%                                           | 340                                                 | $P = 1$                                                           |
| Final Medical School    |                                                | Aberdeen                   | 21.1%                                           | 20                                                  | $\chi^2 = 83.491$<br>$P = 0.001$                                  |
|                         |                                                | Barts                      | 34.2%                                           | 80                                                  |                                                                   |
|                         |                                                | Birmingham                 | 40.3%                                           | 65                                                  |                                                                   |
|                         |                                                | Brighton and Sussex        | 42.1%                                           | 20                                                  |                                                                   |
|                         |                                                | Bristol                    | 46.3%                                           | 40                                                  |                                                                   |
|                         |                                                | Cambridge                  | 65.9%                                           | 40                                                  |                                                                   |
|                         |                                                | Cardiff                    | 25.6%                                           | 40                                                  |                                                                   |
|                         |                                                | Dundee                     | 29.7%                                           | 35                                                  |                                                                   |
|                         | Edinburgh                                      | 39.5%                      | 40                                              |                                                     |                                                                   |
|                         | Glasgow                                        | 25.0%                      | 40                                              |                                                     |                                                                   |
|                         | Hull York                                      | 15.8%                      | 20                                              |                                                     |                                                                   |
|                         | Imperial                                       | 52.9%                      | 105                                             |                                                     |                                                                   |
| Keele                   | 23.1%                                          | 15                         |                                                 |                                                     |                                                                   |
| King's                  | 36.8%                                          | 85                         | London and Lancaster removed due to low Ns      |                                                     |                                                                   |

| Group | Factor | Category    | Percent offered place on OST training programme | N doctors in sample – UKMED rounding rules applied. | Bivariate Association. Bonferroni correction applied for 18 tests |
|-------|--------|-------------|-------------------------------------------------|-----------------------------------------------------|-------------------------------------------------------------------|
|       |        | Leeds       | 43.6%                                           | 40                                                  |                                                                   |
|       |        | Leicester   | 31.7%                                           | 40                                                  |                                                                   |
|       |        | Liverpool   | 25.0%                                           | 35                                                  |                                                                   |
|       |        | Manchester  | 31.1%                                           | 75                                                  |                                                                   |
|       |        | Newcastle   | 33.3%                                           | 50                                                  |                                                                   |
|       |        | Norwich     | 30.4%                                           | 25                                                  |                                                                   |
|       |        | Nottingham  | 40.0%                                           | 40                                                  |                                                                   |
|       |        | Oxford      | 62.8%                                           | 45                                                  |                                                                   |
|       |        | Peninsula   | 32.5%                                           | 40                                                  |                                                                   |
|       |        | Queen's     | 20.7%                                           | 30                                                  |                                                                   |
|       |        | Sheffield   | 34.4%                                           | 30                                                  |                                                                   |
|       |        | Southampton | 23.8%                                           | 40                                                  |                                                                   |
|       |        | St George's | 30.3%                                           | 90                                                  |                                                                   |
|       |        | Swansea     | 14.3%                                           | 5                                                   |                                                                   |
|       |        | UCL         | 55.6%                                           | 100                                                 |                                                                   |
|       |        | Warwick     | 23.5%                                           | 15                                                  |                                                                   |
